# Supplementary material for: COVID-19-Associated Pulmonary Aspergillosis: A Single-Center Experience in Central Valley, California, January 2020–March 2021
Source: MDPI journal article supplement (doi:10.3390/jof7110948), 2021-11-10
Supplement: s1 [file s1]

**Supplemental Table S1: Clinical, radiological, mycological findings in the forty-eight patients and their ECMM/ISHAM CAPA definition categories**

| Patient | Interval from COVID* to first <i>Aspergillus</i> detection in days | Fever >100.5 without another attributable cause | Worsening respiratory failure without another attributable cause | Imaging findings                                               | <i>Aspergillus</i> species recovered   | Source of <i>Aspergillus</i> culture      | Number of occasions isolated | Serum GM** index | BAL† GM index | Serum BDG¥          | ECMM/ISHAM‡ category |
|---------|--------------------------------------------------------------------|-------------------------------------------------|------------------------------------------------------------------|----------------------------------------------------------------|----------------------------------------|-------------------------------------------|------------------------------|------------------|---------------|---------------------|----------------------|
| 1       | 11                                                                 | Yes                                             | Yes                                                              | Diffuse nodular opacities                                      | <i>A. Fumigatus</i><br><i>A. niger</i> | Endotracheal aspirate                     | 2                            | NT£              | NT            | Positive 308 pg/ml  | Possible             |
| 2       | 4                                                                  | No                                              | Yes                                                              | Diffuse nodular opacities                                      | <i>A. Fumigatus</i><br><i>A. niger</i> | BAL, Endotracheal aspirate<br>Lung tissue | 4                            | Positive 0.75    | NT            | Positive 226 pg/ml  | Proven               |
| 3       | 14                                                                 | No                                              | Yes                                                              | Diffuse ground glass opacities                                 | <i>A. Fumigatus</i>                    | Endotracheal aspirate                     | 2                            | Negative         | NT            | Negative            | Possible             |
| 4       | 21                                                                 | Yes                                             | Yes                                                              | Patchy ground glass opacities with area of focal consolidation | <i>A. Fumigatus</i>                    | Endotracheal aspirate                     | 1                            | NT               | NT            | NT                  | Possible             |
| 5       | 12                                                                 | Yes                                             | Yes                                                              | Diffuse ground glass opacities                                 | <i>A. flavus</i>                       | Endotracheal aspirate                     | 1                            | Positive 2.71    | NT            | Positive >500 pg/ml | Probable             |
| 6       | 37                                                                 | Yes                                             | Yes                                                              | Diffuse ground glass opacities                                 | <i>A. niger</i>                        | Endotracheal aspirate                     | 2                            | Negative         | NT            | NT                  | Possible             |
| 7       | 12                                                                 | No                                              | No                                                               | Diffuse nodular opacities                                      | <i>A. niger</i>                        | Endotracheal aspirate                     | 1                            | NT               | NT            | NT                  | Possible             |
| 8       | 21                                                                 | Yes                                             | Yes                                                              | Patchy ground glass opacities with area of focal consolidation | <i>Aspergillus</i> spp.                | Endotracheal aspirate                     | 1                            | NT               | NT            | Positive >500 pg/ml | Possible             |
| 9       | 19                                                                 | No                                              | Yes                                                              | Patchy ground glass opacities                                  | <i>A. Fumigatus</i>                    | Endotracheal aspirate                     | 1                            | Negative         | NT            | Positive >500 pg/ml | Possible             |
| 10      | 14                                                                 | No                                              | Yes                                                              | Diffuse nodular opacities                                      | <i>A. Fumigatus</i>                    | Endotracheal aspirate                     | 1                            | Positive 2       | NT            | Positive >500 pg/ml | Probable             |
| 11      | 7                                                                  | Yes                                             | Yes                                                              | Diffuse ground glass opacities                                 | <i>A. Fumigatus</i>                    | Endotracheal aspirate                     | 2                            | NT               | NT            | NT                  | Possible             |

|    |    |     |     |                                              |                                        |                       |   |               |          |                     |          |
|----|----|-----|-----|----------------------------------------------|----------------------------------------|-----------------------|---|---------------|----------|---------------------|----------|
| 12 | 11 | Yes | Yes | Diffuse ground glass opacities               | <i>A. niger</i>                        | Endotracheal aspirate | 2 | NT            | NT       | NT                  | Possible |
| 13 | 8  | Yes | Yes | Patchy ground glass opacities                | <i>A. Fumigatus</i>                    | Endotracheal aspirate | 1 | Negative      | NT       | NT                  | Possible |
| 14 | 15 | Yes | Yes | Diffuse ground glass opacities               | <i>A. niger</i>                        | Endotracheal aspirate | 3 | Positive 1.56 | NT       | Positive >500 pg/ml | Probable |
| 15 | 13 | No  | Yes | Diffuse ground glass opacities               | <i>A. Fumigatus</i>                    | Endotracheal aspirate | 1 | NT            | NT       | NT                  | Possible |
| 16 | 32 | Yes | Yes | Cavitary lung lesion                         | <i>A. niger</i>                        | BAL                   | 1 | Negative      | NT       | Positive 299 pg/ml  | Probable |
| 17 | 11 | No  | No  | Patchy ground glass opacities                | <i>Aspergillus</i> spp.                | Endotracheal aspirate | 2 | NT            | NT       | NT                  | Possible |
| 18 | 12 | No  | No  | Diffuse ground glass opacities               | <i>A. niger</i>                        | Endotracheal aspirate | 1 | NT            | NT       | Negative            | Possible |
| 19 | 22 | No  | Yes | Diffuse ground glass opacities               | <i>A. flavus</i>                       | Endotracheal aspirate | 1 | NT            | NT       | NT                  | Possible |
| 20 | 9  | Yes | Yes | Patchy ground glass infiltrates              | <i>A. fumigatus</i>                    | Endotracheal aspirate | 2 | NT            | NT       | NT                  | Possible |
| 21 | 21 | Yes | Yes | Diffuse nodular opacities                    | <i>A. fumigatus</i>                    | Endotracheal aspirate | 1 | NT            | NT       | NT                  | Possible |
| 22 | 6  | Yes | Yes | Diffuse ground glass opacities               | <i>A. fumigatus</i>                    | BAL                   | 1 | NT            | Negative | NT                  | Probable |
| 23 | 35 | Yes | No  | Diffuse ground glass opacities               | <i>A. niger</i>                        | Endotracheal aspirate | 1 | NT            | NT       | NT                  | Possible |
| 24 | 20 | Yes | No  | Diffuse ground glass opacities               | <i>A. niger</i><br><i>A. fumigatus</i> | Endotracheal aspirate | 2 | NT            | NT       | Negative            | Possible |
| 25 | 9  | Yes | Yes | Diffuse ground glass opacities, Lung nodules | <i>A. fumigatus</i>                    | Endotracheal aspirate | 2 | Negative      | NT       | NT                  | Possible |
| 26 | 17 | Yes | Yes | Diffuse ground glass opacities               | <i>Aspergillus</i> spp.                | Endotracheal aspirate | 2 | NT            | NT       | NT                  | Possible |
| 27 | 14 | No  | Yes | Diffuse ground glass opacities               | <i>A. fumigatus</i>                    | Endotracheal aspirate | 1 | NT            | NT       | Positive 83 pg/ml   | Possible |

|    |    |     |     |                                                     |                                        |                            |   |               |          |                    |          |
|----|----|-----|-----|-----------------------------------------------------|----------------------------------------|----------------------------|---|---------------|----------|--------------------|----------|
| 28 | 14 | Yes | Yes | Patchy ground glass opacities                       | <i>A. fumigatus</i>                    | Endotracheal aspirate      | 1 | NT            | NT       | NT                 | Possible |
| 29 | 43 | Yes | Yes | Patchy ground glass opacities                       | <i>A. fumigatus</i>                    | Endotracheal aspirate      | 1 | NT            | NT       | NT                 | Possible |
| 30 | 21 | No  | Yes | Patchy ground glass opacities                       | <i>A. niger</i>                        | Endotracheal aspirate      | 1 | NT            | NT       | NT                 | Possible |
| 31 | 17 | No  | Yes | Patchy ground glass opacities                       | <i>A. fumigatus</i>                    | BAL                        | 1 | Positive 3.9  | NT       | NT                 | Probable |
| 32 | 7  | Yes | No  | Diffuse ground glass opacities                      | <i>A. fumigatus</i>                    | Endotracheal aspirate      | 1 | NT            | NT       | NT                 | Possible |
| 33 | 6  | Yes | Yes | Patchy ground glass opacities                       | <i>A. fumigatus</i><br><i>A. niger</i> | Endotracheal aspirate      | 2 | Negative      | NT       | Positive 167 pg/ml | Possible |
| 34 | 24 | No  | Yes | Focal consolidation, patchy ground glass opacities  | <i>A. fumigatus</i>                    | Endotracheal aspirate      | 1 | NT            | NT       | Positive 203 pg/ml | Possible |
| 35 | 13 | Yes | Yes | Focal consolidation, diffuse ground glass opacities | <i>A. fumigatus</i><br><i>A. niger</i> | Endotracheal aspirate, BAL | 2 | NT            | Negative | NT                 | Probable |
| 36 | 4  | No  | Yes | Diffuse ground glass opacities                      | <i>A. fumigatus</i>                    | Endotracheal aspirate      | 2 | NT            | NT       | NT                 | Possible |
| 37 | 25 | Yes | Yes | Diffuse ground glass opacities                      | <i>A. fumigatus</i><br><i>A. niger</i> | Endotracheal aspirate      | 1 | Negative      | NT       | Negative           | Possible |
| 38 | 16 | No  | Yes | Diffuse ground glass opacities, cavitory lesion     | <i>A. fumigatus</i>                    | Endotracheal aspirate      | 1 | NT            | NT       | NT                 | Possible |
| 39 | 50 | No  | No  | Diffuse ground glass opacities                      | <i>A. fumigatus</i>                    | Endotracheal aspirate      | 1 | NT            | NT       | Negative           | Possible |
| 40 | 7  | Yes | No  | Cavitory lung lesion                                | <i>A. fumigatus</i><br><i>A. niger</i> | Endotracheal aspirate      | 2 | Positive 1.14 | NT       | Positive 188 pg/ml | Probable |
| 41 | 9  | No  | No  | Focal consolidation                                 | <i>A. fumigatus</i>                    | Endotracheal aspirate      | 1 | NT            | NT       | NT                 | Possible |
| 42 | 4  | No  | Yes | Patchy ground glass opacities                       | <i>A. fumigatus</i><br><i>A. niger</i> | Endotracheal aspirate      |   | Negative      | NT       | NT                 | Possible |

|    |    |     |     |                                                          |                            |                              |   |    |    |    |          |
|----|----|-----|-----|----------------------------------------------------------|----------------------------|------------------------------|---|----|----|----|----------|
| 43 | 29 | No  | Yes | Cavitary lung lesion                                     | <i>Aspergillus species</i> | Endotracheal aspirate, BAL   | 2 | NT | NT | NT | Probable |
| 44 | 12 | Yes | Yes | Diffuse ground glass opacities with patchy consolidation | <i>A. fumigatus</i>        | Endotracheal aspirate, blood | 2 | NT | NT | NT | Proven   |
| 45 | 9  | No  | No  | Focal consolidation                                      | <i>A. fumigatus</i>        | Endotracheal aspirate        | 1 | NT | NT | NT | Possible |
| 46 | 12 | Yes | Yes | Patchy ground glass opacities                            | <i>A. niger</i>            | Endotracheal aspirate        | 1 | NT | NT | NT | Possible |
| 47 | 13 | No  | Yes | Diffuse ground glass opacities                           | <i>A. niger</i>            | Endotracheal aspirate        | 1 | NT | NT | NT | Possible |
| 48 | 12 | Yes | Yes | Diffuse ground glass opacities                           | <i>A. niger</i>            | Endotracheal aspirate        | 1 | NT | NT | NT | Possible |

\*Coronavirus disease 2019 \*\*Galactomannan † Broncho-alveolar lavage ¥ 1,3, beta-d-glucan ¶ European Confederation of Medical Mycology and the International Society for Human and Animal Mycology £not tested

Reference range for 1,3, beta-d-glucan < 60 pg/ml, serum aspergillus galactomannan index > 0.5, BAL aspergillus galactomannan index > 1.0

Foot note for patient number 2 Tissue biopsy: Numerous fungal organisms morphologically consistent with *Aspergillus* along with acute inflammation
