# Supplementary material for: COVID-19-Associated Pulmonary Aspergillosis: A Single-Center Experience in Central Valley, California, January 2020–March 2021
Source: MDPI journal article supplement (doi:10.3390/jof7110948), 2021-11-10
Supplement: s1 [file s1]

**Table S2 Antimicrobial sensitivities of *Aspergillus fumigatus* isolate from patient 2**

|                |        |             |
|----------------|--------|-------------|
| Amphotericin B | 2      | MIC (µg/ml) |
| Anidulafungin  | ≤ 0.06 | MEC (µg/ml) |
| Caspofungin    | ≤0.06  | MEC (µg/ml) |
| Isavuconazole  | 2      | MIC (µg/ml) |
| Itraconazole   | 0.25   | MIC (µg/ml) |
| Micafungin     | ≤0.06  | MEC (µg/ml) |
| Posaconazole   | ≤0.06  | MIC (µg/ml) |
| Voriconazole   | 2      | MIC (µg/ml) |

MIC: Minimum inhibitory concentration MEC: Minimum effective concentration
